# Supplementary material
Source: publisher site journal article supplement (https://www.spandidos-publications.com/4330/downloadSupplementary)
Supplement: Supplementary file 1 [file downloadSupplementary]

Table S1. Primer sequences used for reverse transcription-quantitative PCR.

| Gene                   | Forward (5'-3')          | Reverse (5'-3')           |
|------------------------|--------------------------|---------------------------|
| HDAC 1                 | ACCGGGCAACGTTACGAAT      | CTATCAAAGGACACGCCAAGTG    |
| HDAC 2                 | TCATTGGAAAATTGACAGCATAGT | CATGGTGATGGTGTGAAGAAG     |
| HDAC 3                 | TTGAGTTCTGCTCGCGTTACA    | CCCAGTTAATGGCAATATCACAGAT |
| HDAC 4                 | AATCTGAACCACTGCATTTCCA   | GGTGGTTATAGGAGGTGCGACT    |
| HDAC 5                 | TTGGAGACGTGGAGTACCTTACAG | GACTAGGACCACATCAGGTGAGAAC |
| HDAC 6                 | TGGCTATTGCATGTTCAACCA    | GTCGAAGGTGAACTGTGTTCTT    |
| HDAC 7                 | CTGCATTGGAGGAATGAAGCT    | CTGGCACAGCGGATGTTTG       |
| HDAC 8                 | TCCCGAGTATGTCAGTATATATGA | GCTTCAATCAAAGAATGCACCA    |
| HDAC 9                 | CAGGCGGAAGGATGGAAATG     | ATGCGTTGCTGTGAAACCAT      |
| HDAC 10                | GGCCTTTGAGTTTGACCCTG     | CAGCGTCTGTACTGTCATGC      |
| HDAC 11                | TGTCTACAACCGCCACATCT     | CGGTGCCTGCATTGTATACC      |
| GAPDH                  | GCTCATTTCTGGTATGAC       | ACAGGGTACTTTATTGATGGT     |
| Ki-67                  | CGGATCGTCCCAGTGGAAG      | TTGCCTCCTGCTCATGGATT      |
| E2Ftranscriptionfactor | GCTGGAGCTAGGAGAAAGCG     | CAAGAGACGTATCATACCGCGT    |
| 18SrRNA                | GATCAAACCAACCCGGTCA      | CCGTTTCTCAGGCTCCCTCT      |

HDAC, histone deacetylase; E2F3,
